# Supplementary material
Source: publisher figshare collection journal article supplement (https://tandf.figshare.com/ndownloader/files/14941838)
Supplement: Supplementary file 1 [file 14941838]

---

## SUPPLEMENTARY MATERIAL

### One new xanthenone from the marine-derived fungus *Aspergillus versicolor* MF160003

Zhijun Song<sup>a,b,†</sup>, Jieyu Gao<sup>a,c†</sup>, Jiansen Hu<sup>a,b</sup>, Hongtao He<sup>a,b</sup>, Pei Huang<sup>a,d</sup>, Lixin Zhang<sup>e,\*</sup> and Fuhang Song<sup>a,\*</sup>

<sup>a</sup>Key Laboratory of Pathogenic Microbiology and Immunology, Institute of Microbiology, Chinese Academy of Sciences, Beijing 100101, China

<sup>b</sup>University of Chinese Academy of Sciences, Beijing 100049, China

<sup>c</sup>School of Food and Biological Engineering, Hefei University of Technology, Hefei 230009, China

<sup>d</sup>Department of Pediatrics, Affiliated Hospital of Zunyi Medical College, Zunyi 563000, China

<sup>e</sup>State Key Laboratory of Bioreactor Engineering, East China University of Science of Technology, Shanghai 200237, China

†The authors contributed to this work equally.

\*Corresponding author: Fuhang Song

E-mail: songfuhang@im.ac.cn

\*Corresponding author: Lixin Zhang

E-mail: lxzhang@ecust.edu.cn

**Abstract:** A new xanthenone derivative, 3-hydroxy pinselin (**1**), together with five known analogues (**2-6**) were isolated from the marine-derived fungus *Aspergillus versicolor* MF160003. Their structures were identified by extensive 1D- and 2D-NMR, and high-resolution mass spectrometry data. Compounds **5** and **6** showed moderate bioactivities against BCG with MIC values of 40 and 20 µg/mL, respectively.

**Keywords:** Marine-derived fungus; *Aspergillus versicolor*; xanthenone; anti-BCG

---

## List of contents

|                                                                                         |   |
|-----------------------------------------------------------------------------------------|---|
| Figure S1. $^1\text{H}$ NMR spectrum (500 MHz, $\text{DMSO}-d_6$ ) of <b>1</b> .....    | 3 |
| Figure S2. $^{13}\text{C}$ NMR spectrum (500 MHz, $\text{DMSO}-d_6$ ) of <b>1</b> ..... | 3 |
| Figure S3. HMBC spectrum (500 MHz, $\text{DMSO}-d_6$ ) of <b>1</b> .....                | 4 |
| Figure S4. Key HMBC correlations (H-C) of <b>1</b> .....                                | 4 |
| Table S1 1D NMR data of compound <b>1</b> (500 MHz, $\text{DMSO}-d_6$ ) .....           | 5 |
| Table S2 Antibacterial activities of compounds <b>1</b> – <b>6</b> .....                | 5 |

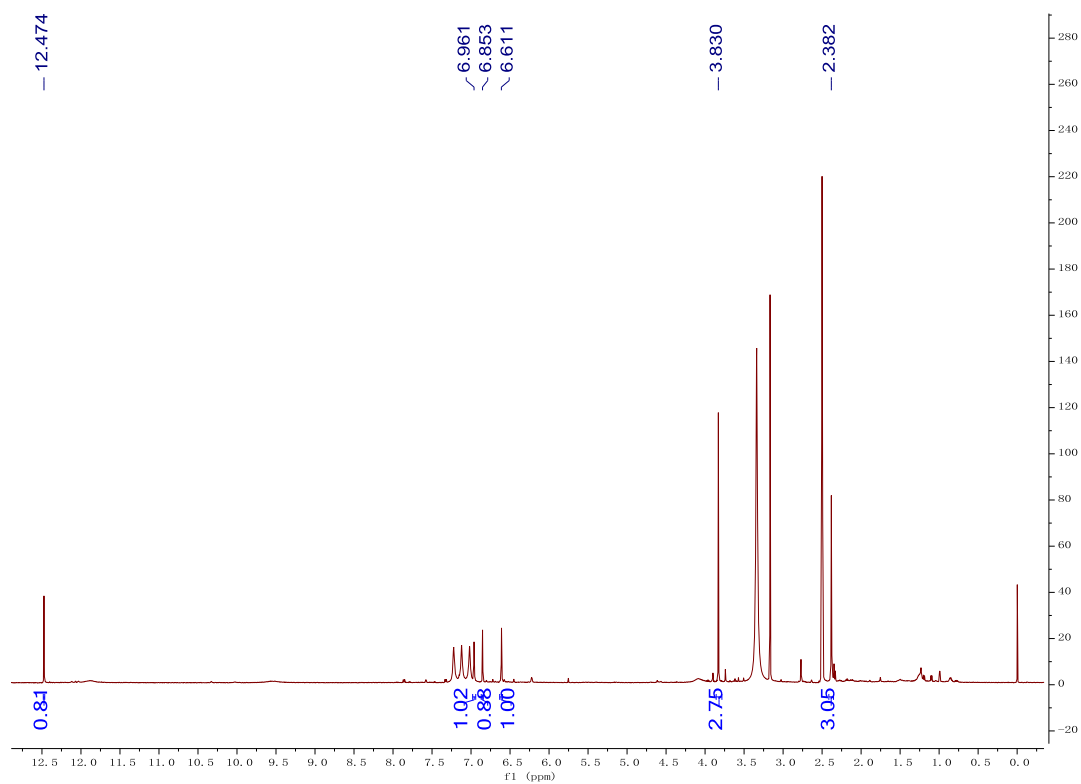

Figure S1. <sup>1</sup>H NMR spectrum (500 MHz, DMSO) of **1**

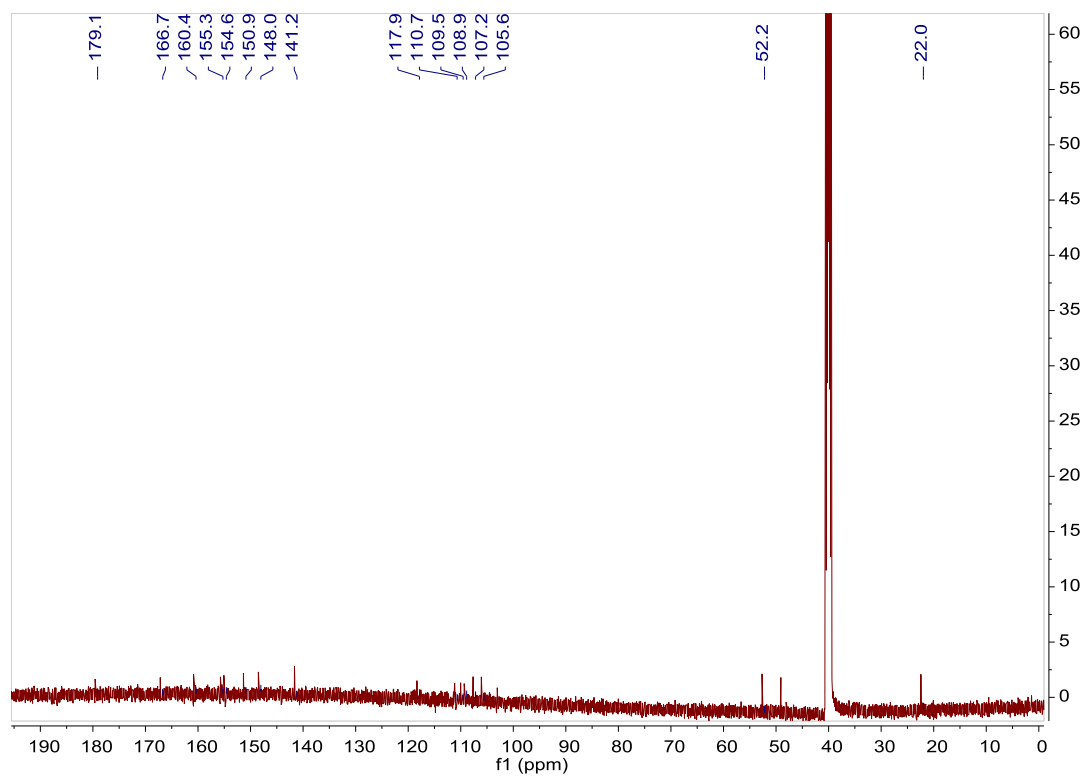

Figure S2. <sup>13</sup>C NMR spectrum (500 MHz, DMSO) of **1**

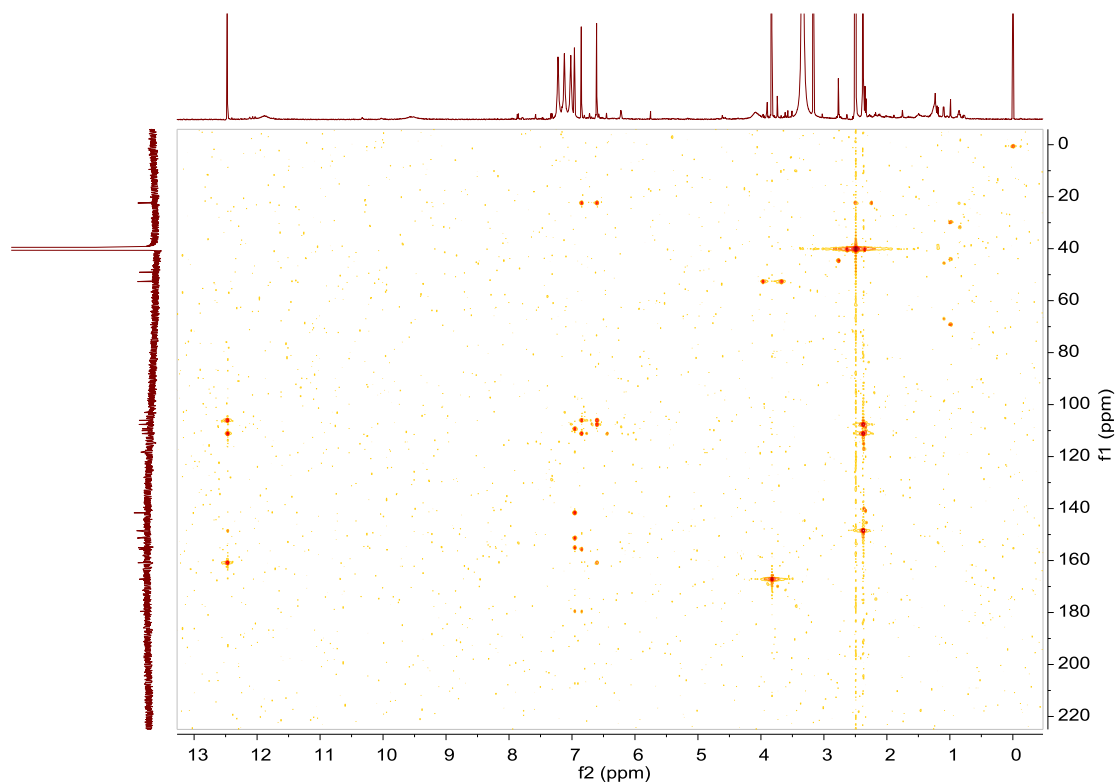

**Figure S3.** HMBC spectrum (500 MHz, DMSO) of **1**

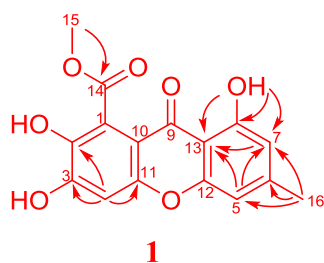

**Figure S4.** Key HMBC correlation (H-C) of **1**

**Table S1** 1D NMR a date of compounds **1** (500 MHz, DMSO-*d*<sub>6</sub>)

| Pos. | <b>1</b>                   |                                         |
|------|----------------------------|-----------------------------------------|
|      | $\delta_{\text{C}}$ , mult | $\delta_{\text{H}}$ , ( <i>J</i> in Hz) |
| 1    | 117.8                      |                                         |
| 2    | 154.6                      |                                         |
| 3    | 141.1                      |                                         |
| 4    | 109.5                      | 6.96, s                                 |
| 5    | 107.1                      | 6.85, s                                 |
| 6    | 150.8                      |                                         |
| 7    | 110.7                      | 6.61, s                                 |
| 8    | 160.3                      |                                         |
| 9    | 179.1                      |                                         |
| 10   | 108.8                      |                                         |
| 11   | 148.0                      |                                         |
| 12   | 155.2                      |                                         |
| 13   | 105.6                      |                                         |
| 14   | 166.7                      |                                         |
| 15   | 52.2                       | 3.83, s                                 |
| 16   | 21.9                       | 2.38, s                                 |
| 8-OH |                            | 12.47, s                                |

NMR spectra were taken on a Bruker 500 MHz NMR system in DMSO-*d*<sub>6</sub> with the residual solvent peaks as an internal standard ( $\delta_{\text{C}}$  39.52,  $\delta_{\text{H}}$  2.50 ppm.)

**Table S2** Antibacterial activities of compounds **1–6**

| Organism (strain)                                   | <b>1</b> | <b>2</b> | <b>3</b> | <b>4</b> | <b>5</b> | <b>6</b> | Control            |
|-----------------------------------------------------|----------|----------|----------|----------|----------|----------|--------------------|
| Methicillin-resistant <i>S. aureus</i> <sup>d</sup> | >100     | >100     | >100     | >100     | >100     | >100     | 1.25 <sup>a</sup>  |
| <i>S. aureus</i> (ATCC 6538)                        | >100     | >100     | >100     | >100     | >100     | >100     | 0.625 <sup>a</sup> |
| <i>B. subtilis</i> (ATCC 6633)                      | >100     | >100     | >100     | >100     | >100     | >100     | 0.313 <sup>a</sup> |
| <i>P. aeruginosa</i> (ATCC 15692)                   | >100     | >100     | >100     | >100     | >100     | >100     | 2.5 <sup>b</sup>   |
| BCG (M.bovis Pasteur 1173P2)                        | >100     | >100     | >100     | >100     | 40       | 20       | 0.02 <sup>c</sup>  |

<sup>a</sup> Vancomycin

<sup>b</sup> Ciprofloxacin

<sup>c</sup> Isoniazid

<sup>d</sup> MRSA, Clinical isolates, Beijing Chao-yang Hospital, Beijing, China
